# Supplementary material
Source: publisher site journal article supplement (https://www.degruyterbrill.com/publication/journal_key/JOGS/downloadAsset/JOGS_Topical%20Issue%20Proposal%20Form.zip)
Supplement: Supplementary file 1 [file mark_splm_s20819943_Topical Issue Proposal Form.pdf › mark_splm_s20819943_Topical Issue Proposal Form.pdf]

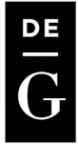

DE GRUYTER  
OPEN

## Journal of Geodetic Science – ‘Topical Issue’ Proposal Form

Please fill the form and send to: [jan.barabach@degruyteropen.com](mailto:jan.barabach@degruyteropen.com)

Journal of Geodetic Science is a peer-reviewed, electronic-only journal that publishes original, high-quality research on topics broadly related to Geodesy. The journal focuses on theoretical and application papers.

### Contact person

Name:   
Address:   
E-mail:

### Type of issue

Conference ☐ Place:  Date:  /  /  Link to conference   
Other ☐

### Topic/Subject of special issue

### Scope of the issue

- |                                                                 |                                                                                 |
|-----------------------------------------------------------------|---------------------------------------------------------------------------------|
| <input type="checkbox"/> Surveying Engineering                  | <input type="checkbox"/> Satellite Gravimetry                                   |
| <input type="checkbox"/> Inertial Geodesy                       | <input type="checkbox"/> Global Navigation Satellite Systems (GNSS)             |
| <input type="checkbox"/> Geodetic Networks                      | <input type="checkbox"/> Geometric Geodesy                                      |
| <input type="checkbox"/> Geoid determination and height systems | <input type="checkbox"/> Numerical methods and software developments in Geodesy |
| <input type="checkbox"/> Deformation Analysis                   | <input type="checkbox"/> Geodynamics                                            |
| <input type="checkbox"/> Marine Geodesy                         | <input type="checkbox"/> Geophysical Geodesy                                    |
| <input type="checkbox"/> Adjustment Theory                      | <input type="checkbox"/> Geometric Geodesy                                      |
| <input type="checkbox"/> Satellite Altimetry                    | <input type="checkbox"/> Other <input type="text"/>                             |
| <input type="checkbox"/> Mathematical Geodesy                   |                                                                                 |

### Short description of content

### Guest editor

Name:   
Address:   
E-mail:

Estimated number of submitted manuscripts

Date for all manuscripts to be submitted

/  /
