# Supplementary material
Source: publisher site journal article supplement (https://www.degruyterbrill.com/publication/journal_key/JOGS/downloadAsset/JOGS_Topical%20Issue%20Proposal%20Form.zip)
Supplement: Supplementary file 1 [file Topical Issue Proposal Form.docx]

**Journal of Geodetic Science – ‘Topical Issue’ Proposal Form**

*Please fill the form and send to:* [*jan.barabach@degruyteropen.com*](mailto:jan.barabach@degruyteropen.com)

Journal of Geodetic Science is a peer-reviewed, electronic-only journal that publishes original, high-quality research on topics broadly related to Geodesy. The journal focuses on theoretical and application papers.

**Contact person**

Name:

Address:

E-mail:

**Type of issue**

Conference  Place:       Date:    /  /     Link to conference

Other

**Topic/Subject of special issue**

**Scope of the issue**

Surveying Engineering

Inertial Geodesy

Geodetic Networks

Geoid determination and height systems

Deformation Analysis

Marine Geodesy

Adjustment Theory

Satellite Altimetry

Mathematical Geodesy

Satellite Gravimetry

Global Navigation Satellite Systems (GNSS)

Geometric Geodesy

Numerical methods and software developments in Geodesy

Geodynamics

Geophysical Geodesy

Geometric Geodesy

Other

**Short description of content**

**Guest editor**

Name:

Address:

E-mail:

**Estimated number of submitted manuscripts**

**Date for all manuscripts to be submitted**    /  /
